# Supplementary material for: Systemic infection exacerbates cerebrovascular dysfunction in Alzheimer’s disease
Source: PubMed Central journal article supplement (PMC8320299; doi:10.1093/brain/awab094), 2021-03-16
Supplement: awab094_supplementary_data.pdf [file awab094_supplementary_data.pdf]

## **Supplementary Tables and Figures**

| <b>Con Vs<br/>AD</b> | <b>Diagnosis<br/>Con Vs AD</b> | <b>Systemic<br/>Infection</b> | <b>Interaction<br/>effect</b> | <b>Con Vs<br/>VaD</b> | <b>Diagnosis<br/>Con Vs VaD</b> | <b>Systemic<br/>Infection</b> | <b>Interaction<br/>effect</b> |
|----------------------|--------------------------------|-------------------------------|-------------------------------|-----------------------|---------------------------------|-------------------------------|-------------------------------|
| <b>IL-5</b>          | p < 0.01                       | NS                            | NS                            | <b>IL-5</b>           | p < 0.05                        | NS                            | NS                            |
| <b>IL-17A</b>        | p < 0.0001                     | NS                            | p < 0.05                      | <b>IL-17A</b>         | p < 0.01                        | NS                            | NS (0.070)                    |
| <b>GM-CSF</b>        | NS                             | 0.022                         | p < 0.0001                    | <b>GM-CSF</b>         | NS                              | 0.022                         | 0.032                         |
| <b>IL-13</b>         | p < 0.05                       | p < 0.05                      | NS                            | <b>IL-13</b>          | NS (0.098)                      | NS                            | p < 0.01                      |
| <b>IL-15</b>         | p < 0.00001                    | p < 0.01                      | NS                            | <b>IL-15</b>          | p < 0.05                        | p < 0.01                      | NS                            |
| <b>IL-1B</b>         | NS                             | p < 0.01                      | NS                            | <b>IL-1B</b>          | NS                              | NS                            | p < 0.001                     |
| <b>IL-6</b>          | NS                             | p < 0.01                      | NS                            | <b>IL-6</b>           | NS                              | NS                            | NS (0.066)                    |
| <b>TNF-a</b>         | NS                             | NS                            | NS                            | <b>TNF-a</b>          | NS                              | NS                            | NS                            |
| <b>IL-8</b>          | NS (0.077)                     | p < 0.05                      | NS                            | <b>IL-8</b>           | NS (0.064)                      | NS                            | 0.025                         |
| <b>IFN-g</b>         | 0.014                          | p < 0.05                      | p < 0.01                      | <b>IFN-g</b>          | NS                              | NS                            | NS                            |
| <b>IL-2</b>          | NS                             | NS                            | NS                            | <b>IL-2</b>           | NS                              | NS                            | NS                            |
| <b>IL-4</b>          | NS                             | NS                            | 0.043                         | <b>IL-4</b>           | NS                              | NS                            | NS                            |
| <b>IL-7</b>          | NS                             | NS                            | NS                            | <b>IL-7</b>           | NS                              | NS                            | NS                            |
| <b>IL-10</b>         | NS (0.051)                     | NS                            | NS                            | <b>IL-10</b>          | NS                              | NS                            | NS                            |
| <b>IL-12/p40</b>     | p < 0.05                       | NS                            | NS (0.055)                    | <b>IL-12/p40</b>      | NS                              | NS                            | NS                            |
| <b>IL-12/p70</b>     | NS                             | NS                            | p < 0.05                      | <b>IL-12/p70</b>      | NS                              | NS                            | NS                            |
| <b>IL-16</b>         | NS                             | NS                            | NS                            | <b>IL-16</b>          | NS                              | NS                            | NS                            |

**Supplementary Table 1.** The contribution of systemic infection on brain cytokine levels in Alzheimer's disease (AD) and Vascular dementia (VaD). 2-WAY ANOVAs were performed to identify disease-specific differences and identify whether systemic infection significantly altered brain cytokine levels in Con Vs AD and Con Vs VaD, indicated by the interaction effect. p-values < 0.05 were considered statistically significant (p-values approaching p < 0.05 are shown in parenthesis).

| <b>Con Vs AD</b>               | <b>Diagnosis<br/>Con Vs AD</b> | <b>Systemic<br/>infection</b> | <b>Interaction<br/>effect</b> | <b>Con Vs<br/>VaD</b>          | <b>Diagnosis<br/>Con Vs VaD</b> | <b>Systemic<br/>Infection</b> | <b>Interaction<br/>effect</b> |
|--------------------------------|--------------------------------|-------------------------------|-------------------------------|--------------------------------|---------------------------------|-------------------------------|-------------------------------|
| <b>MAG:PLP1</b>                | p < 0.00001                    | p < 0.00001                   | p < 0.00001                   | <b>MAG:PLP1</b>                | p < 0.0001                      | p < 0.001                     | p < 0.01                      |
| <b>VEGF-A</b>                  | P < 0.001                      | P < 0.01                      | NS                            | <b>VEGF-A</b>                  | p < 0.0001                      | p < 0.0001                    | p < 0.01                      |
| <b>Fibrinogen</b>              | p < 0.001                      | p < 0.001                     | NS                            | <b>Fibrinogen</b>              | p < 0.00001                     | p < 0.00001                   | NS                            |
| <b>PDGFR<math>\beta</math></b> | p < 0.001                      | NS                            | p < 0.05                      | <b>PDGFR<math>\beta</math></b> | p < 0.001                       | p < 0.01                      | NS                            |
| <b>EDN1</b>                    | NS                             | NS                            | NS                            | <b>EDN1</b>                    | P < 0.05                        | NS                            | NS                            |

**Supplementary Table 2.** The contribution of systemic infection on vascular dysfunction in the temporal cortex (BA22) in Alzheimer's disease (AD) and Vascular dementia (VaD). 2-WAY ANOVAs were performed to identify differences in vascular marker between disease groups and whether systemic infection contributes to disease-related changes in cerebrovascular markers in Control (Con) Vs AD and Control (Con) Vs VaD. p values < 0.05 were considered statistically significant (p-values approaching p < 0.05 are shown in parenthesis).

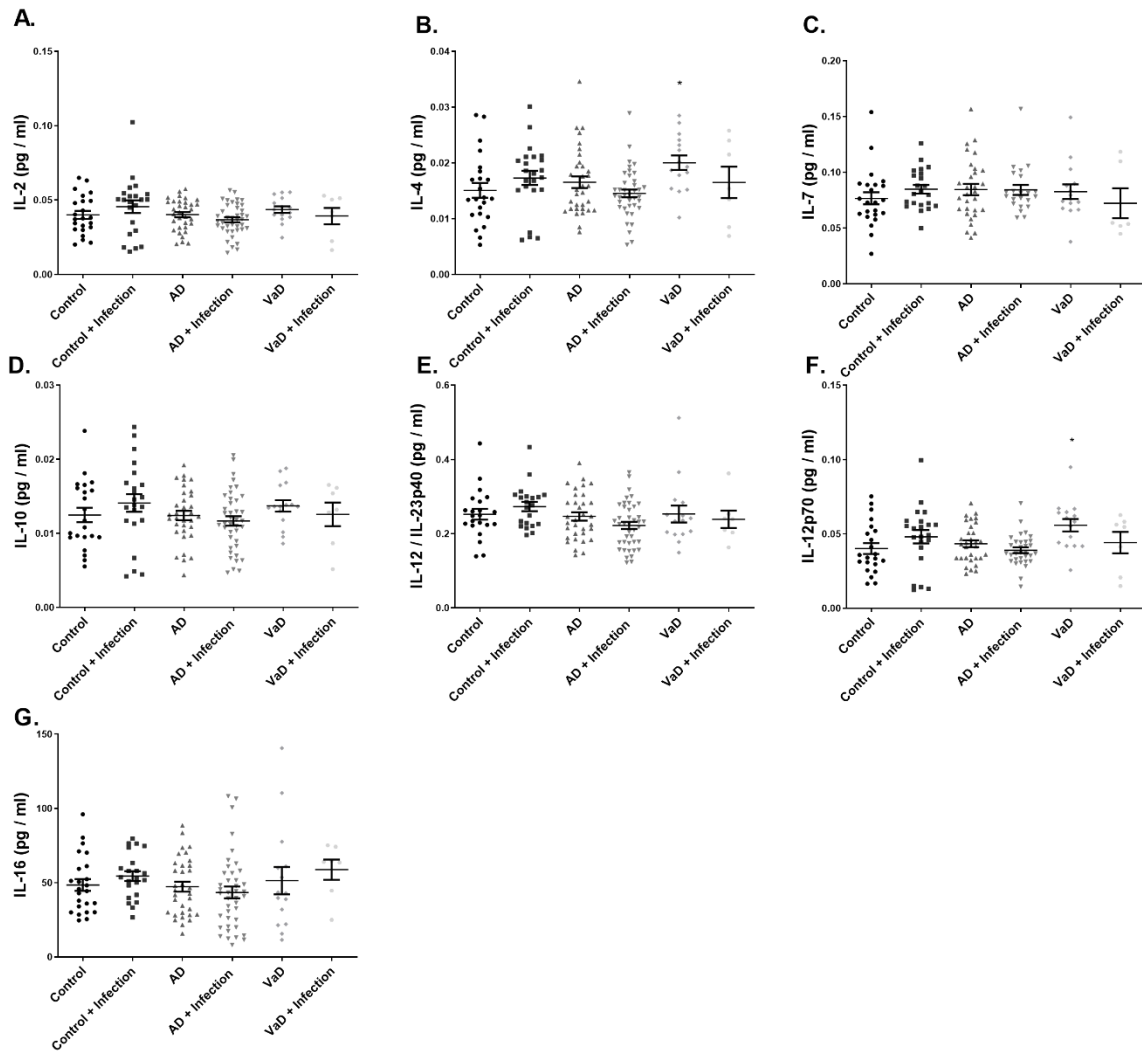

**Supplementary Figure 1. Influence of systemic infection on brain cytokine levels in Alzheimer’s disease and vascular dementia.** Scatterplots showing cytokine levels in the superior temporal cortex in post-mortem brain tissue in Alzheimer’s disease (AD) and vascular dementia (VaD) in the absence or presence of terminal systemic infection. Cytokine levels were measured using an MSD multiplex panel. Each point represents the mean of duplicate measurements for an individual. Horizontal bars indicate the cohort mean  $\pm$  SEM.

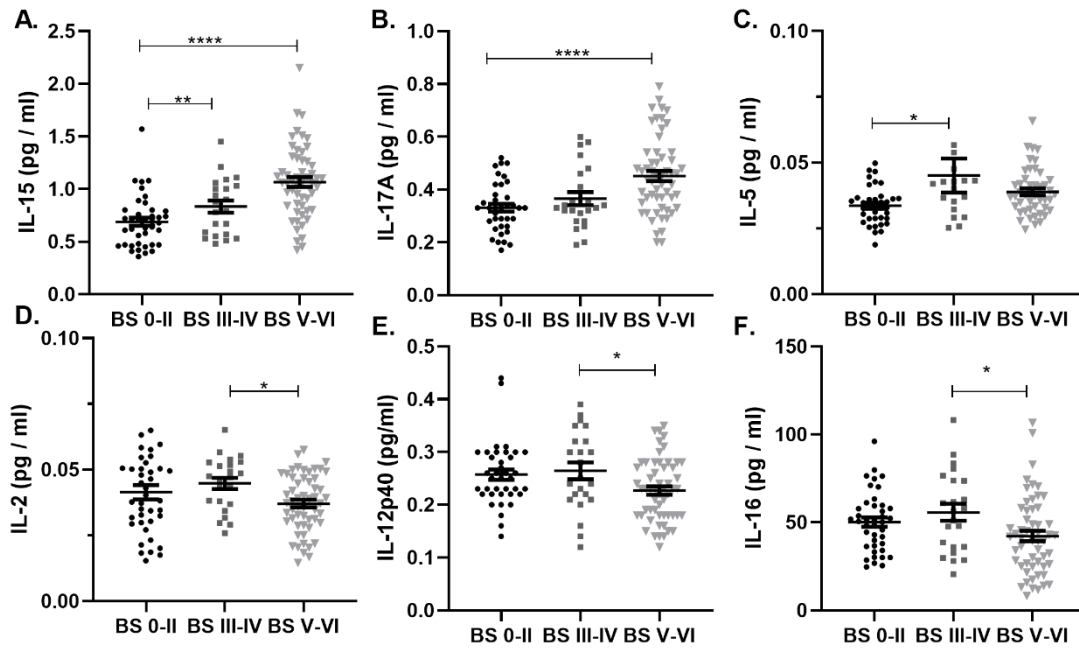

**Supplementary Figure 2. Brain cytokine levels in relation to Braak tangle stage.**

Scatterplots showing cytokine levels in the superior temporal cortex (BA22) in post-mortem brain tissue in a combined AD and control cohort stratified according to Braak tangle stage (BS): BS 0-II, BS III-IV and BS V-VI. Cytokine levels were measured using an MSD

multiplex panel. Each point represents the mean of duplicate measurements for an individual. Horizontal bars indicate the cohort mean  $\pm$  SEM. \*  $p < 0.05$ , \*\*  $p < 0.01$ , \*\*\*  $p < 0.001$ , \*\*\*\*

$p < 0.0001$

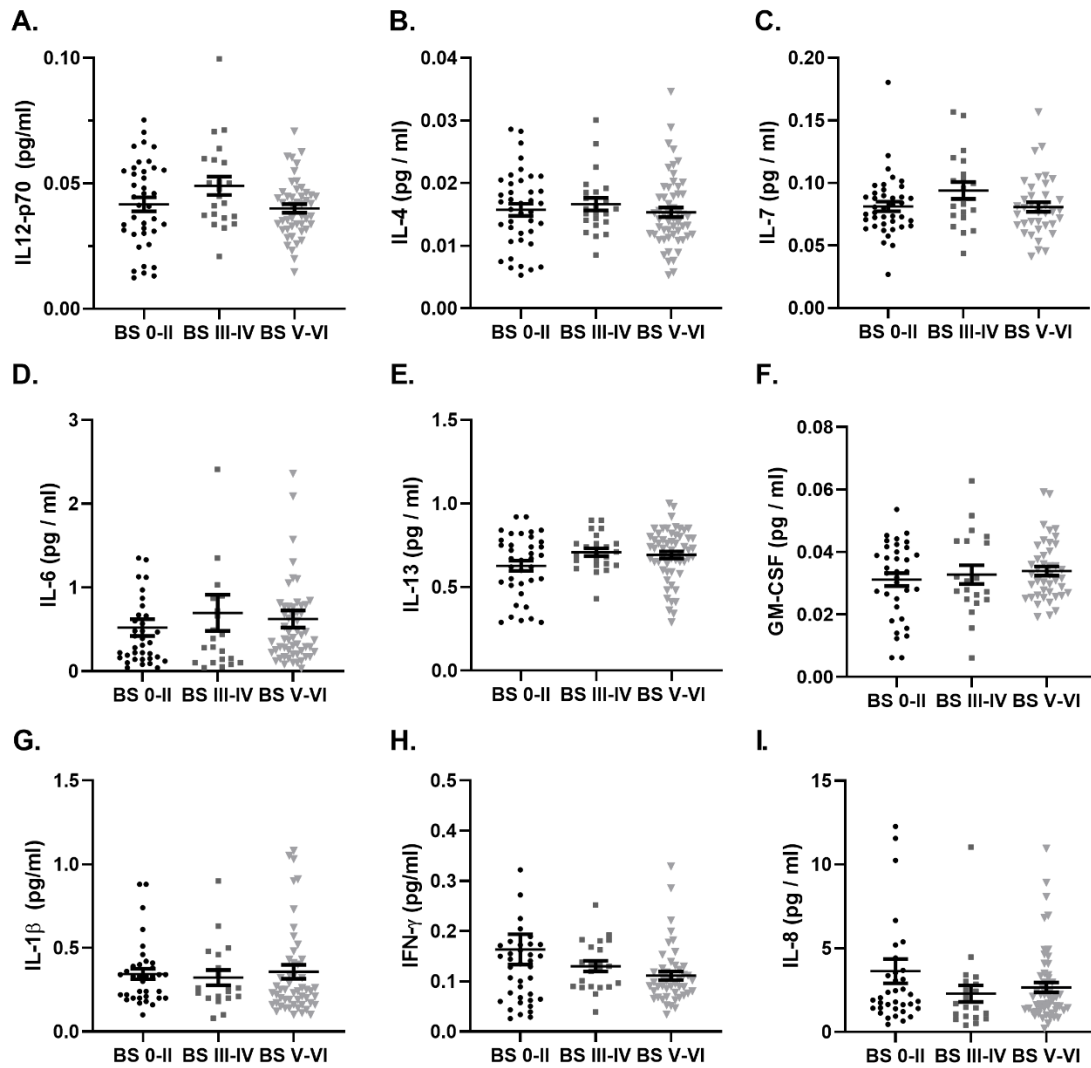

**Supplementary Figure 3. Influence of Braak tangle stage pathology on brain cytokine levels.** Scatterplots showing cytokine levels in the superior temporal cortex in post-mortem brain tissue in a combined Alzheimer’s disease and age-matched control cohort. Each point represents the mean of a duplicate measurement for an individual. Horizontal bars indicate the cohort mean  $\pm$  SEM

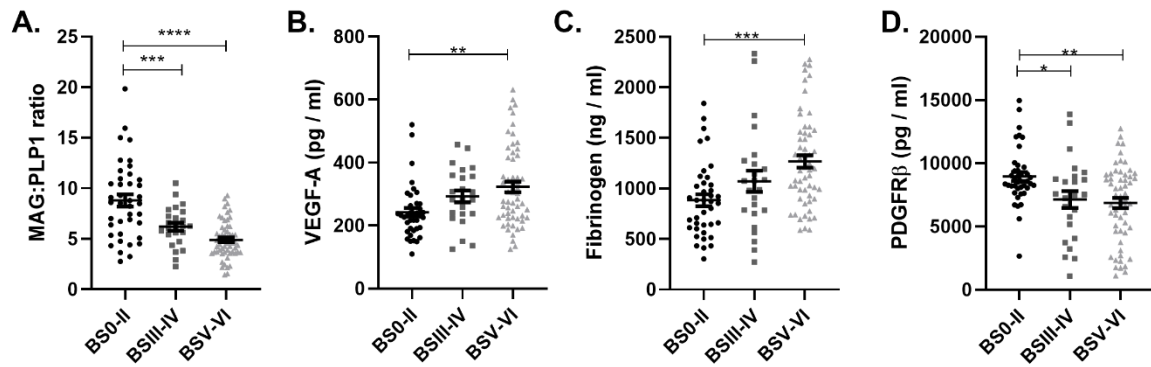

**Supplementary Figure 4. Vascular markers in relation to Braak tangle.** Scatterplots showing (A) MAG:PLP1 ration (B) VEGF (C) Fibrinogen and (D) PDGFR $\beta$  in AD and control cases divided into Braak tangle stage (BS). Each point represents the mean of a duplicate measurement for an individual. Horizontal bars indicate the cohort mean  $\pm$  SEM. \*  $p < 0.05$  \*\*  $p < 0.01$  \*\*\*  $p < 0.001$  \*\*\*\*  $p < 0.0001$

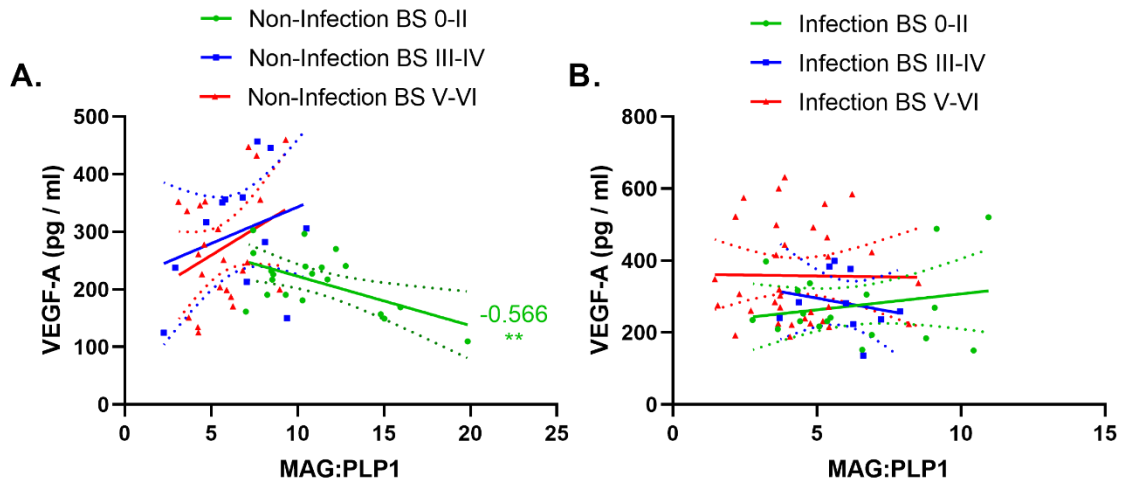

**Supplementary Figure 5. Relationship between MAG:PLP and VEGF: influence of infection.** In brains with minimal tangle pathology (BS 0-II) but not more advanced disease, VEGF correlated negatively with MAG:PLP1 in superior temporal cortex. With infection, this correlation was lost even in BS 0-II disease. The best-fit linear regression lines and 95% confidence intervals are shown.

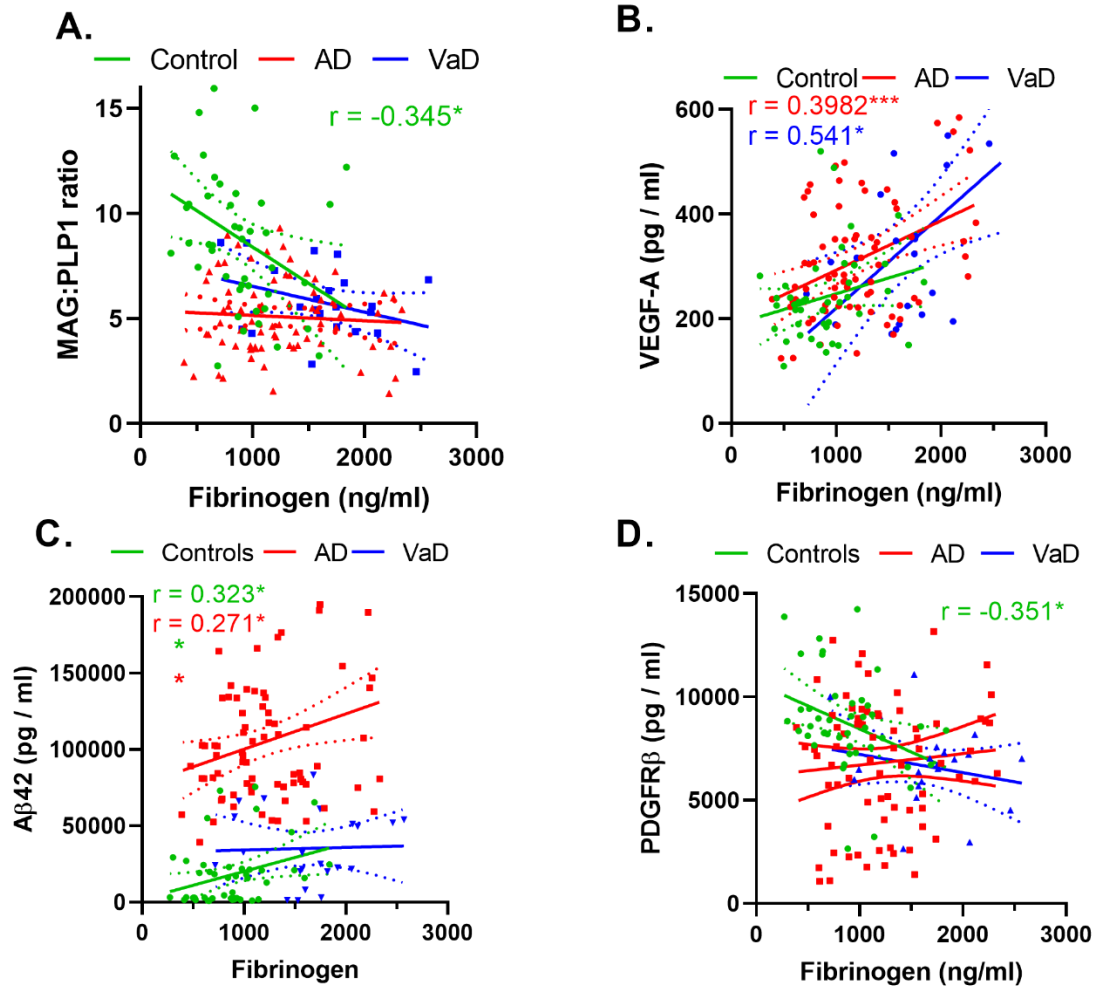

**Supplementary Figure 6: Relationships between brain fibrinogen level and markers of brain perfusion (MAG:PLP1), pericyte content (PDGFR $\beta$ ) and A $\beta$ 42 in dementia. (A-B)** Brain fibrinogen correlated with MAG:PLP1, a marker of reduced oxygenation and positively with VEGF, a marker of acute ischaemia, in AD and VaD. (C) Fibrinogen was increased in relation to A $\beta$ 42 in AD only. (D) Fibrinogen was related to lower PDGFR $\beta$  level in controls. The best-fit linear regression lines and 95% confidence intervals are shown.



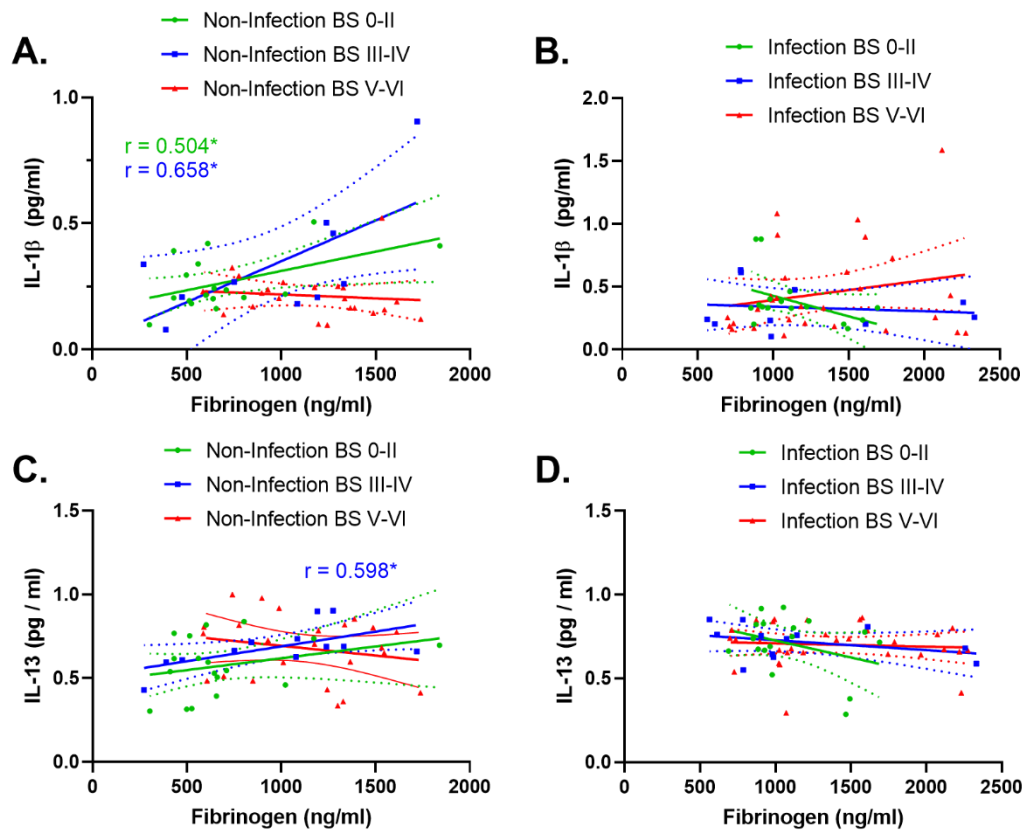

**Supplementary Figure 7. Relationship between fibrinogen and brain cytokines:**

**influence of Braak stage and infection.** Most brain cytokines did not correlate with fibrinogen level, however, fibrinogen correlated with IL-1 $\beta$  in BS III-IV and V-VI in cases without systemic infection but not with infection. Fibrinogen correlated positively with IL-13 in BS III-IV without but not with infection. The best-fit linear regression lines and 95% confidence intervals are shown.

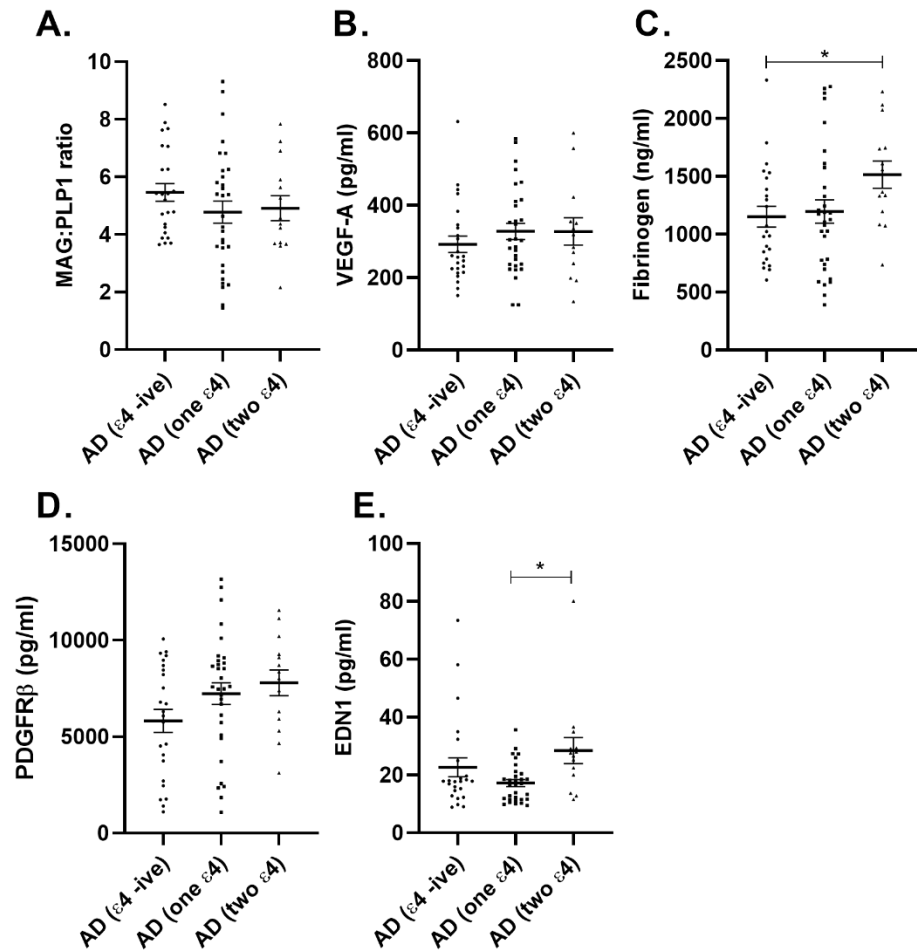

**Supplementary Figure 8. Vascular markers in relation to *APOE* genotype.** Scatterplots showing (A) MAG:PLP1 ration (B) VEGF (C) Fibrinogen (D) PDGFR $\beta$  and EDN1 (E) in AD cases ( $\epsilon 4$  -ive indicates absence of  $\epsilon 4$  and possession of either *APOE*  $\epsilon 2$  or  $3$ ; one  $\epsilon 4$  = heterozygosity; two  $\epsilon 4$  = homozygosity). Each point represents the mean of a duplicate measurement for an individual. Horizontal bars indicate the cohort mean  $\pm$  SEM. \*  $p < 0.05$

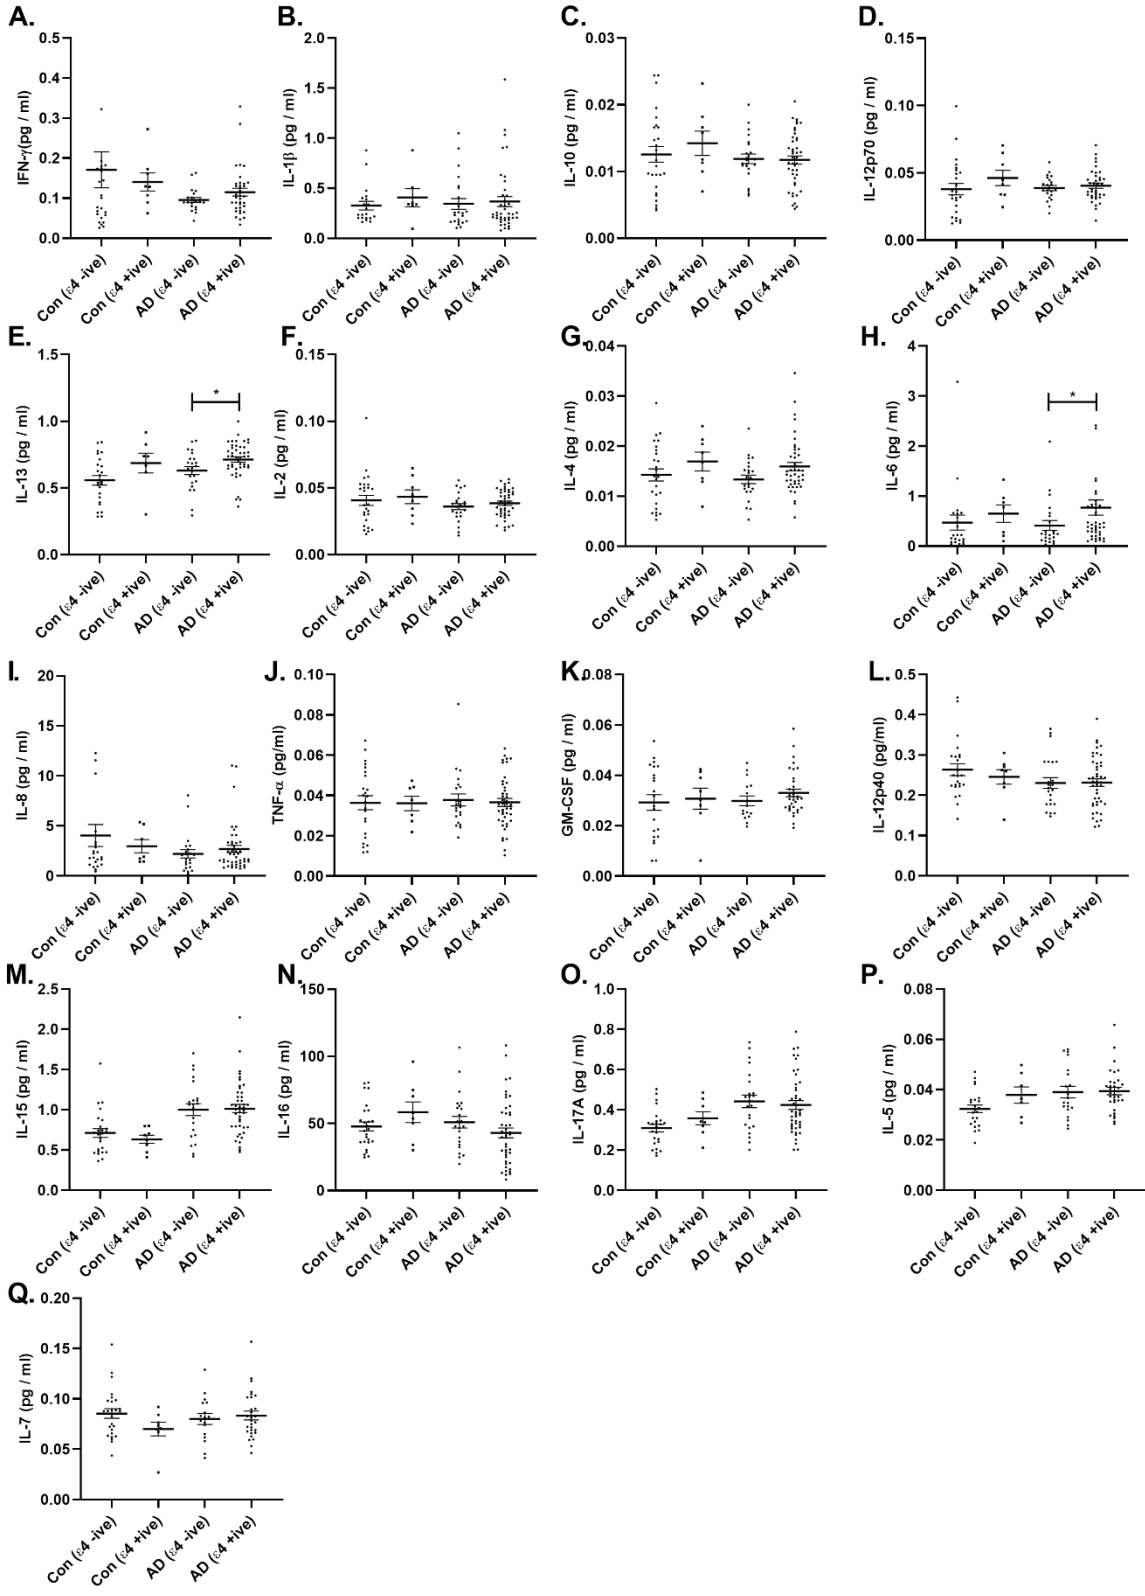

**Supplementary Figure 9. Brain cytokines in relation to *APOE* genotype.** Scatterplots showing individual brain cytokine level (A-Q) in relation to presence ( $\epsilon 4$  +ve) and absence ( $\epsilon 4$  -ve) of *APOE*  $\epsilon 4$  allele in the control and Alzheimer's disease cohort. Each point represents the mean of a duplicate measurement for an individual. Horizontal bars indicate the cohort mean  $\pm$  SEM. \*  $p < 0.05$

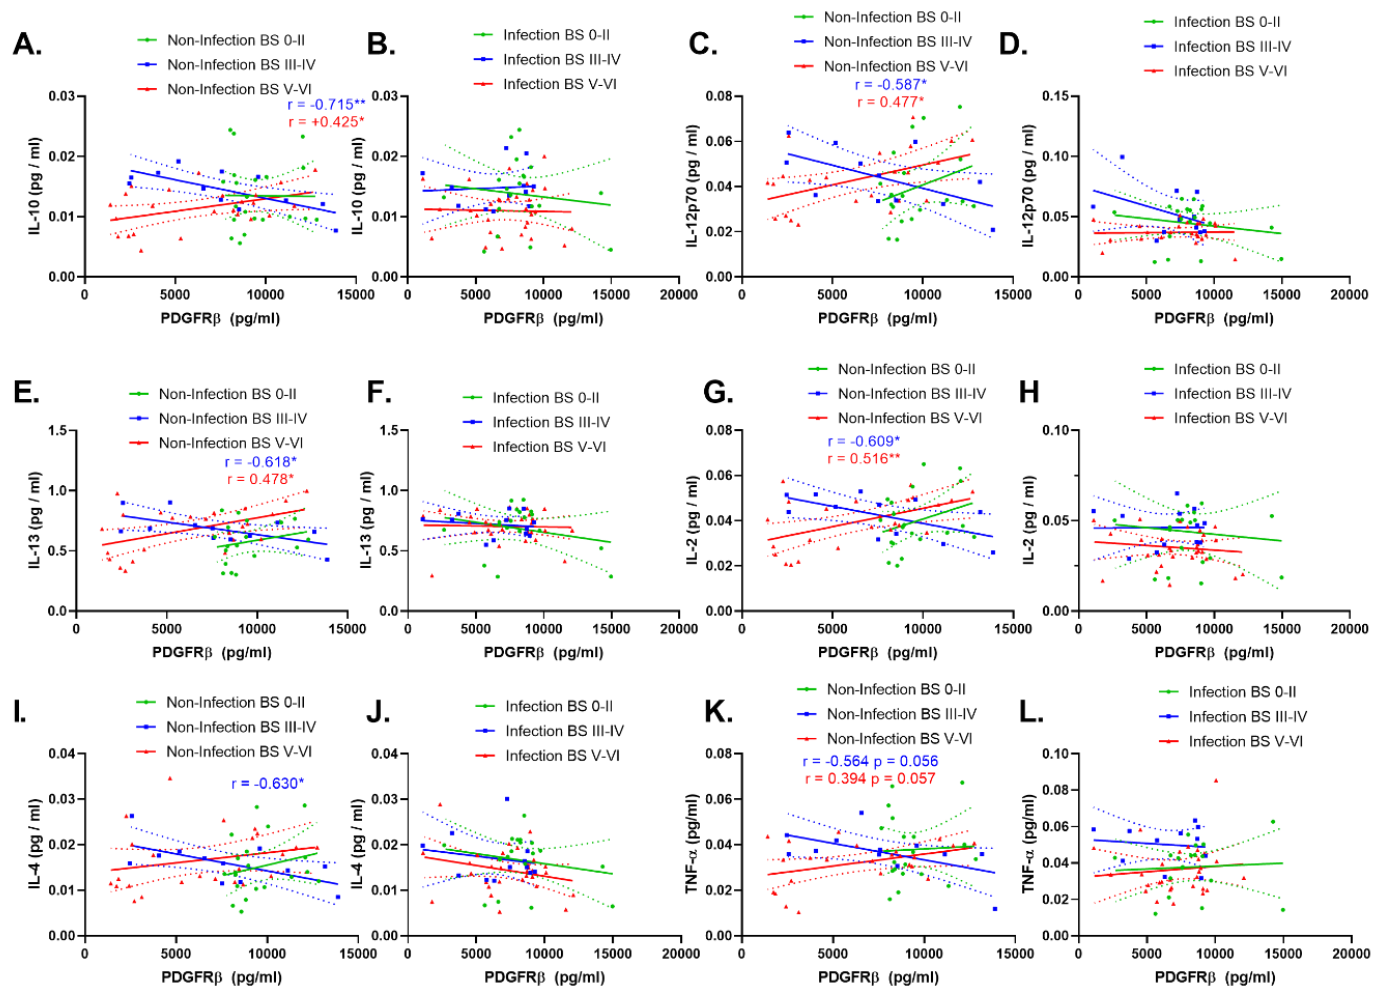

### Supplementary Figure 10. Relationship between PDGFRβ and brain cytokines:

**influence of Braak stage and infection.** In brains with intermediate tau tangle pathology

(BS III-IV), PDGFRβ correlated negatively with several brain cytokines, but positively in BS

V-VI, in cases without infection. This relationship as lost in cases with systemic infection.

The best-fit linear regression lines and 95% confidence intervals are shown.

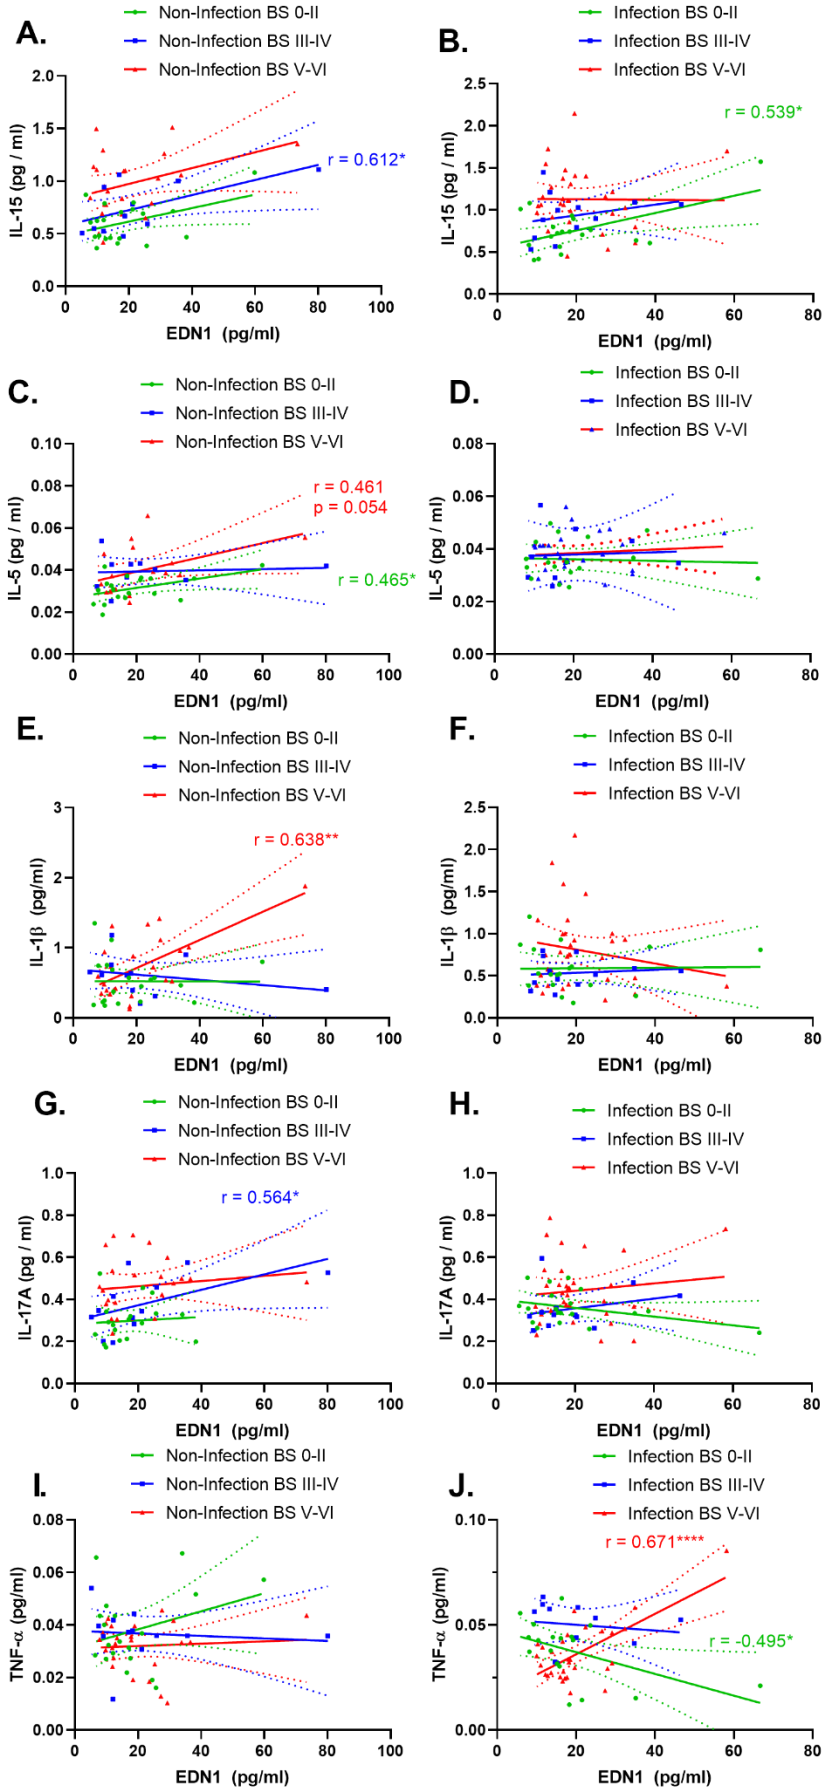

**Supplementary Figure 11. Relationships between endothelin-1 and brain cytokines: influence of Braak stage and infection.** EDN1 correlated with several brain cytokines in cases with disease pathology (BS III-IV or BSV-VI) without systemic infection but not in cases with infection. The notable exception was TNF- $\alpha$ , which was strongly positively correlated with EDN1 in BS V-VI in the presence of infection. The best-fit linear regression lines and 95% confidence intervals are shown.

| <b>Control (-)</b> | <b>Control (+)</b> | <b>AD (-)</b> | <b>AD (+)</b> | <b>VaD (-)</b> | <b>VaD (+)</b> |
|--------------------|--------------------|---------------|---------------|----------------|----------------|
| BBN_8671           | BBN_8725           | BBN_8848      | BBN_8825      | BBN_8861       | BBN_8832       |
| BBN_8684           | BBN_8732           | BBN_8852      | BBN_8842      | BBN_9313       | BBN_4223       |
| BBN_8691           | BBN_8735           | BBN_8915      | BBN_8846      | BBN_4208       | BBN_9369       |
| BBN_8706           | BBN_8751           | BBN_8968      | BBN_8850      | BBN_9387       | BBN_14403      |
| BBN_8708           | BBN_8770           | BBN_8990      | BBN_8870      | BBN_19611      | BBN_19628      |
| BBN_8709           | BBN_8888           | BBN_9118      | BBN_8871      | BBN_19622      | BBN006.28583   |
| BBN_8728           | BBN_9028           | BBN_9122      | BBN_8892      | BBN_24309      | BBN006.29152   |
| BBN_8739           | BBN_9329           | BBN_9189      | BBN_8899      | BBN_24310      |                |
| BBN_8835           | BBN_9331           | BBN_9198      | BBN_8910      | BBN_24901      |                |
| BBN_8898           | BBN_9359           | BBN_9200      | BBN_8912      | BBN_24904      |                |
| BBN_8923           | BBN_4229           | BBN_9274      | BBN_8917      | BBN006.26340   |                |
| BBN_8964           | BBN_9392           | BBN_9308      | BBN_8978      | BBN006.26572   |                |
| BBN_9292           | BBN_9408           | BBN_9309      | BBN_9037      | BBN006.31492   |                |
| BBN_9340           | BBN_9422           | BBN_9336      | BBN_9076      | BBN006.32513   |                |
| BBN_9344           | BBN_19608          | BBN_4200      | BBN_9095      | BBN006.33638   |                |
| BBN_4205           | BBN_24337          | BBN_4215      | BBN_9109      |                |                |
| BBN_9354           | BBN_24325          | BBN_4216      | BBN_9112      |                |                |
| BBN_9365           | BBN_26009          | BBN_9361      | BBN_9123      |                |                |
| BBN_9407           | BBN006.26096       | BBN_4231      | BBN_9150      |                |                |
| BBN_19613          | BBN006.28893       | BBN_4232      | BBN_9156      |                |                |
| BBN_22623          | BBN006.29470       | BBN_9367      | BBN_9162      |                |                |
| BBN006.29018       | BBN006.31516       | BBN_9371      | BBN_9188      |                |                |
| BBN006.30165       |                    | BBN_9375      | BBN_9242      |                |                |
| BBN006.30198       |                    | BBN_9377      | BBN_9243      |                |                |
|                    |                    | BBN_9378      | BBN_9263      |                |                |
|                    |                    | BBN_9395      | BBN_9266      |                |                |
|                    |                    | BBN_9417      | BBN_9269      |                |                |



|  |  |              |           |  |  |
|--|--|--------------|-----------|--|--|
|  |  | BBN_9420     | BBN_9295  |  |  |
|  |  | BBN_9426     | BBN_9296  |  |  |
|  |  | BBN_10252    | BBN_9315  |  |  |
|  |  | BBN_19615    | BBN_9317  |  |  |
|  |  | BBN_24330    | BBN_9323  |  |  |
|  |  | BBN006.28710 | BBN_9326  |  |  |
|  |  |              | BBN_9338  |  |  |
|  |  |              | BBN_9341  |  |  |
|  |  |              | BBN_9343  |  |  |
|  |  |              | BBN_9346  |  |  |
|  |  |              | BBN_9372  |  |  |
|  |  |              | BBN_9379  |  |  |
|  |  |              | BBN_9401  |  |  |
|  |  |              | BBN_9433  |  |  |
|  |  |              | BBN_19614 |  |  |

**Supplementary Table 3.** List of MRC UK-BBN identifier numbers for cases used in this study. Controls (Con-/Con+), Alzheimer's disease (AD+/AD-) and Vascular dementia (VaD+/VaD-) with (+) and without systemic infection (-)
